# Supplementary material for: In vitro dioxygenase activity characterization using headspace stir bar sorptive extraction (HSSE)
Source: Royal Society of Chemistry journal article supplement (doi:10.1039/d4ay00827h), 2024-01-01
Supplement: d4ay00827h2.pdf [file d4ay00827h2.pdf]

(A)

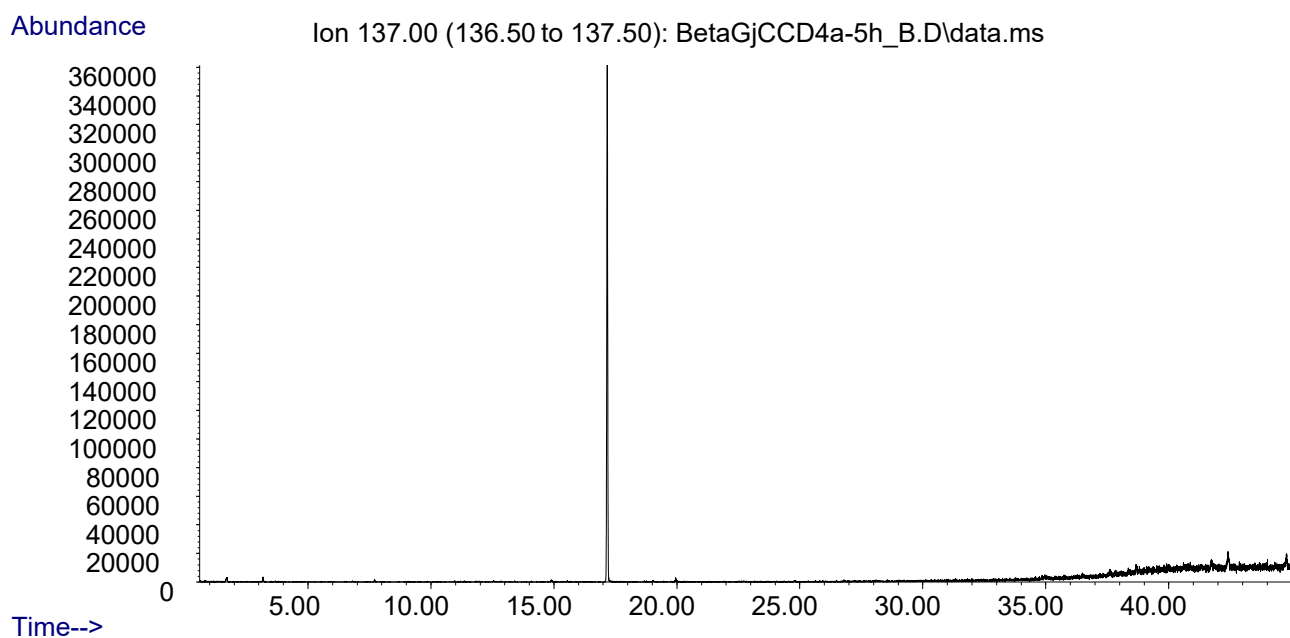

(B)

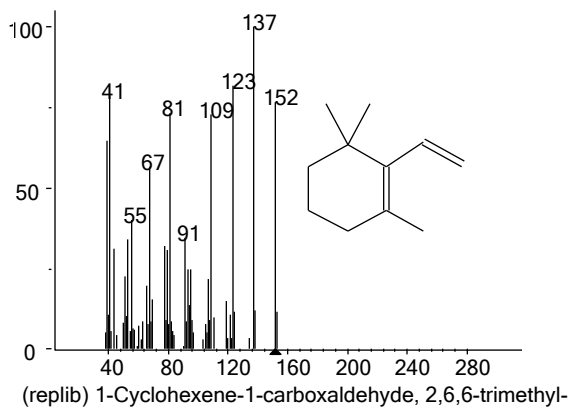

Supplementary Figure 2. GC-MS analysis of  $\beta$ -cyclocitral. (A) Area measured at 137 amu at 5h after induction with arabinose. (B) Mass spectrum of  $\beta$ -cyclocitral
