# Supplementary figures and images for: In vitro dioxygenase activity characterization using headspace stir bar sorptive extraction (HSSE)
Source: Royal Society of Chemistry journal article supplement (doi:10.1039/d4ay00827h), 2024-01-01

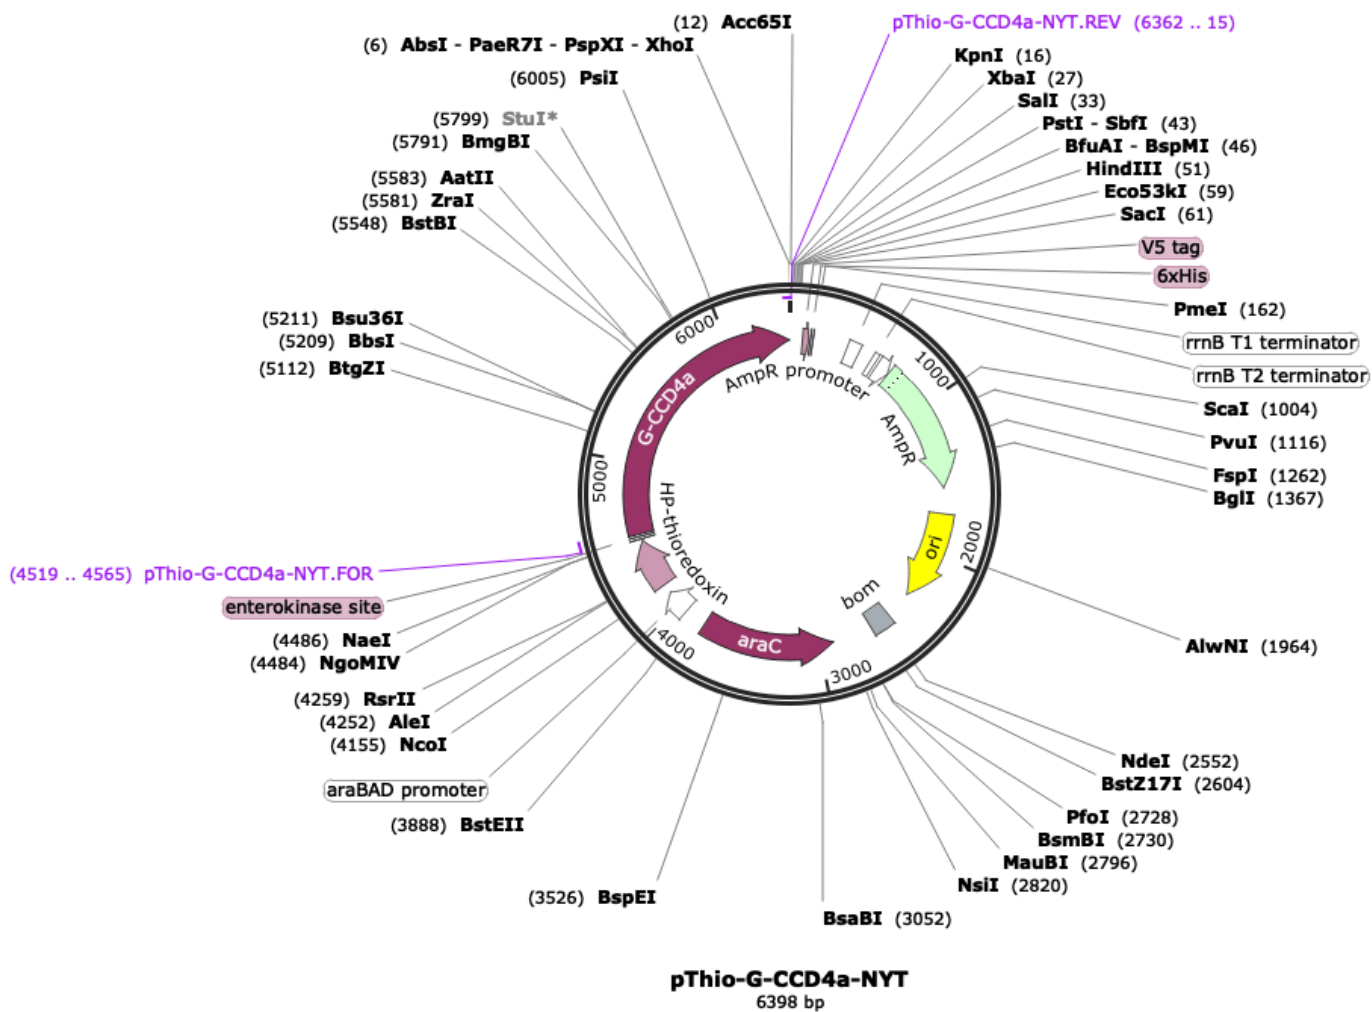

Supplementary Figure 1. GjCCD4a assembled using in Fusion strategy

Supplement: d4ay00827h1.pdf [file d4ay00827h1.pdf]
